# Supplementary material for: Energetic analysis of succinic acid in water droplets: insight into thesize-dependent solubility of atmospheric nanoparticles
Source: Copernicus journal article supplement (doi:10.5194/acp-2020-1329), 2021-02-04
Supplement: Supplementary file 1 [file acp-2020-1329-supplement.pdf]

*Supplement of*

## **Energetic analysis of succinic acid in water droplets: insight into the size-dependent solubility of atmospheric nanoparticles**

5 Chuchu Chen<sup>1,2</sup>, Xiaoxiang Wang<sup>1,6</sup>, Kurt Binder<sup>3</sup>, Mohammad Mehdi Ghahremanpour<sup>4,5</sup>, David van der Spoel<sup>4</sup>, Ulrich Pöschl<sup>2</sup>, Hang Su<sup>2</sup>, Yafang Cheng<sup>1</sup>

<sup>1</sup>Minerva Research Group, Max Planck Institute for Chemistry, Hahn-Meitner-Weg 1, 55128 Mainz, Germany

<sup>2</sup>Multiphase Chemistry Department, Max Planck Institute for Chemistry, Hahn-Meitner-Weg 1, 55128 Mainz, Germany

<sup>3</sup>Institute of Physics, Johannes Gutenberg University of Mainz, Staudinger Weg 7, 55128 Mainz, Germany

<sup>4</sup>Department of Cell and Molecular Biology, Uppsala University, Husargatan 3, Box 596, SE-75124 Uppsala, Sweden

10 <sup>5</sup>Department of Chemistry, Yale University, New Haven, CT 06520-8107, USA

<sup>6</sup>School of Environmental Science and Engineering, Southern University of Science and Technology, 518055 Shenzhen, P. R. China

*Correspondence to:* Yafang Cheng ([yafang.cheng@mpic.de](mailto:yafang.cheng@mpic.de))

## S1. Gibbs energy of hydration for force field selection

We computed the hydration free energy ( $\Delta G_{\text{hyd}}$ ) of one single succinic acid molecule in a box of water using thermodynamic integration (TI) (Kirkwood, 1935) to choose the reasonable force fields for the following PMF calculations. Five different combinations of force fields were used. The Generalized Amber force field (GAFF) (Wang et al., 2004) with the electrostatic potential (ESP) (Case et al., 2006) calculated charges (B3LYP/aug-cc-pVTZ) for the succinic acid was combined with several  
20 force fields: SPC (Berendsen et al., 1981), SPC/E (Berendsen et al., 1987), TIP3P (Jorgensen et al., 1983), TIP4P (Jorgensen et al., 1983), and TIP4P/2005 (Abascal and Vega, 2005) for the water molecules.

The TI simulations were computed with GROMACS 2016.5 (Van Der Spoel et al., 2005) at 298.15 K following the protocol of Shirts et al. (2003). One single succinic acid molecule was set in a cubic box of the volume 27 nm<sup>3</sup> with 877 water molecules.  
25 Contribution of Lennard-Jones and Coulomb interactions between the succinic acid molecule and the water molecules in the box for the thermodynamic integration were carried out using an alchemical reaction coordinate  $\lambda$ , where  $\lambda = 0$  to  $\lambda = 1$  correspond to the initial and final state, respectively. The interaction range was decomposed into 21 equally spaced  $\lambda$ -steps, and each  $\lambda$ -step was initially equilibrated for 200 ps then simulated for 500 ps. The free energy differences for each step was subsequently calculated by integrating  $\langle \partial \mathcal{H} / \partial \lambda \rangle$  from  $\lambda = 0$  to  $\lambda = 1$ .  $\langle \cdot \rangle$  denotes the average computed from the respective  
30 trajectory, where  $\mathcal{H}$  is the Hamiltonian of the system.  $\Delta G_{\text{hyd}}$  is the sum of the free energy differences from  $\lambda = 0$  to  $\lambda = 1$ . In the context of computer simulations, such a use of TI methods is standard (Frenkel and Smit, 2002).

The experimental free energy of hydration ( $\Delta G_{\text{hyd,exp}}$ ) pertinent to the TI simulations with a single solute molecule was implemented as (Sander, 1999; Roeselová et al., 2004)

$$\Delta G_{\text{hyd,exp}} = \Delta G_{\text{hyd,exp}}^0 + RT \ln\left(\frac{p_0}{c_0 RT}\right) \quad (\text{S1})$$

35 where  $\Delta G_{\text{hyd,exp}}^0$  is the experimental hydration free energy corresponding to the standard state of  $p_0 = 1$  atm gas pressure and  $c_0 = 1$  mol L<sup>-1</sup> aqueous concentration,  $R$  is the universal gas constant and  $T = 298.15$  K for the standard state.  $\Delta G_{\text{hyd,exp}}^0$  can be calculated from Henry's law constant  $k_{\text{H}}$  according to (Sander, 1999)

$$\Delta G_{\text{hyd,exp}}^0 = -RT \ln\left(\frac{p_0}{c_0} k_{\text{H}}\right) \quad (\text{S2})$$

$k_{\text{H}}$  ranging from  $3.0 \cdot 10^6$  to  $4.1 \cdot 10^7$  mol m<sup>-3</sup> Pa<sup>-1</sup> in this study was obtained as an average value from Sander (2015).

40 As shown in Fig. S1,  $\Delta G_{\text{hyd}}$  from the combination of GAFF with ESP for the succinic acid molecule and TIP4P/2005 for water molecules is closest to  $\Delta G_{\text{hyd,exp}}$  compared with the other four combinations (Zhang et al., 2018). Therefore, we selected the force field combination of GAFF with ESP for the succinic acid molecule and TIP4P/2005 for water molecules for the following calculations. In view of the approximate character of all force fields for water, discrepancies between calculation and experiment as seen in Fig.S1 are inevitable.

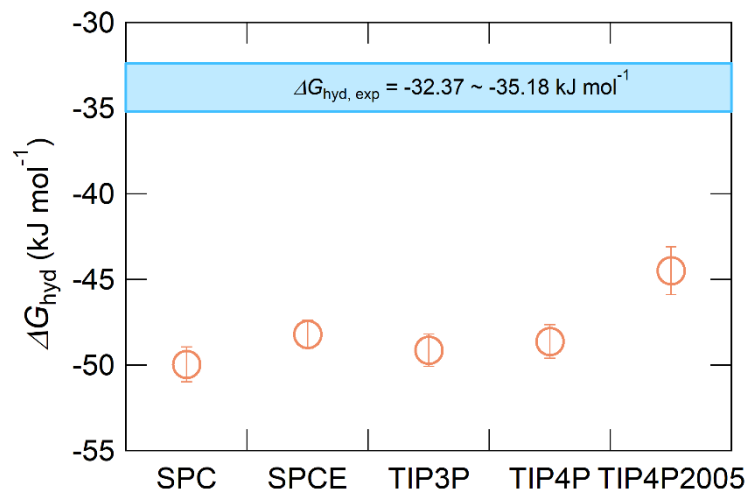

**Figure S1. Gibbs energy of hydration ( $\Delta G_{\text{hyd}}$ )(kJ/mol) at 298.15K for succinic acid using five different force field-water model combinations. The light blue zone represents the experimental free energy of hydration ( $\Delta G_{\text{hyd,exp}}$ ).**

## References

- Abascal, J. L., and Vega, C.: A general purpose model for the condensed phases of water: TIP4P/2005, *The Journal of chemical physics*, 123, 234505, 2005.
- 55 Berendsen, H., Grigera, J., and Straatsma, T.: The missing term in effective pair potentials, *Journal of Physical Chemistry*, 91, 6269-6271, 1987.
- Berendsen, H. J., Postma, J. P., van Gunsteren, W. F., and Hermans, J.: Interaction models for water in relation to protein hydration, in: *Intermolecular forces*, Springer, 331-342, 1981.
- Case, D. A., Darden, T., Cheatham III, T. E., Simmerling, C., Wang, J., Duke, R. E., Luo, R., Merz, K. M., Pearlman, D. A., and Crowley, M.: *AMBER 9*, University of California, San Francisco, 45, 2006.
- 60 Frenkel, D., and Smit, B.: *Understanding molecular simulation: from algorithms to applications*, Academic Press, San Diego, 2002.
- Jorgensen, W. L., Chandrasekhar, J., Madura, J. D., Impey, R. W., and Klein, M. L.: Comparison of simple potential functions for simulating liquid water, *The Journal of chemical physics*, 79, 926-935, 1983.
- Kirkwood, J. G.: Statistical mechanics of fluid mixtures, *The Journal of Chemical Physics*, 3, 300-313, 1935.
- Roeselová, M., Viecelli, J., Dang, L. X., Garrett, B. C., and Tobias, D. J.: Hydroxyl radical at the air– water interface, *Journal of the American*  
65 *Chemical Society*, 126, 16308-16309, 2004.
- Sander, R.: *Compilation of Henry's law constants for inorganic and organic species of potential importance in environmental chemistry*, in: *Max-Planck Institute of Chemistry, Air Chemistry Department Mainz, Germany*, 1999.
- Sander, R.: *Compilation of Henry's law constants (version 4.0) for water as solvent*, *Atmospheric Chemistry and Physics*, 15, 4399-4981, 10.5194/acp-15-4399-2015, 2015.
- 70 Shirts, M. R., Pitner, J. W., Swope, W. C., and Pande, V. S.: Extremely precise free energy calculations of amino acid side chain analogs: Comparison of common molecular mechanics force fields for proteins, *The Journal of chemical physics*, 119, 5740-5761, 2003.
- Van Der Spoel, D., Lindahl, E., Hess, B., Groenhof, G., Mark, A. E., and Berendsen, H. J.: GROMACS: fast, flexible, and free, *Journal of computational chemistry*, 26, 1701-1718, 2005.
- Wang, J., Wolf, R. M., Caldwell, J. W., Kollman, P. A., and Case, D. A.: Development and testing of a general amber force field, *Journal of*  
75 *computational chemistry*, 25, 1157-1174, 2004.
- Zhang, H., Yin, C., Jiang, Y., and van der Spoel, D.: Force field benchmark of amino acids: I. hydration and diffusion in different water models, *Journal of chemical information and modeling*, 58, 1037-1052, 2018.
